# Supplementary material
Source: PubMed Central journal article supplement (PMC6137582)
Supplement: 778381_Supplementary_Figure.pdf [file 778381_Supplementary_Figure.pdf]

**Supplementary Figure:**

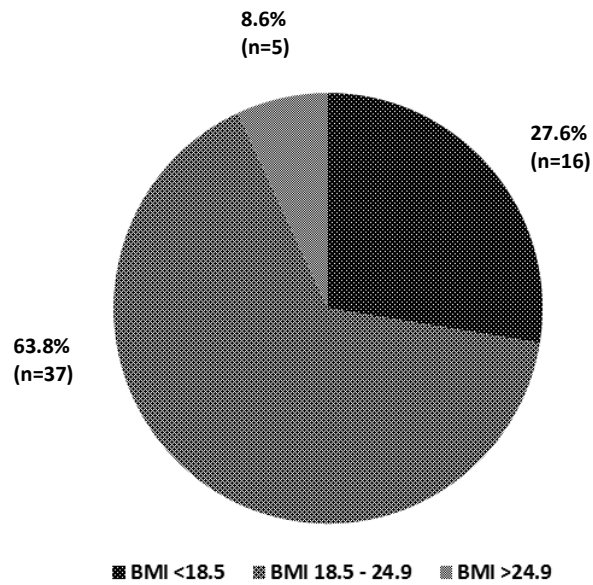

**Supplementary Figure 1. Distribution of BMI categories for the total patient population at first presentation (time point 1).** BMI categories according to WHO [1]: <18.5 malnourished, 18.5-24.9 normal, >24.9 overweight. BMI: body mass index (kg/m<sup>2</sup>).

[1] WHO. Report of a WHO consultation on obesity. Obesity: preventing and managing the global epidemic 2000;894.
