# Supplementary material
Source: PubMed Central journal article supplement (PMC6137582)
Supplement: 778381_Supplementary_Tables.pdf [file 778381_Supplementary_Tables.pdf]

**Supplementary Tables:**

|                    | <b>BMI</b>                | <b>PA</b>  | <b>TBW</b> | <b>FFM</b>  | <b>ECM</b>  | <b>BCM</b>  | <b>ECM/BCM</b> | <b>FM</b>  |
|--------------------|---------------------------|------------|------------|-------------|-------------|-------------|----------------|------------|
|                    | <b>(kg/m<sup>2</sup>)</b> | <b>(°)</b> | <b>(l)</b> | <b>(kg)</b> | <b>(kg)</b> | <b>(kg)</b> | <b>index</b>   | <b>(%)</b> |
| <b>BIA 1, n=58</b> |                           |            |            |             |             |             |                |            |
| <b>(median,</b>    | 19.7                      | 5.3        | 30.3       | 43.1        | 22.4        | 20.1        | 1.08           | 18.5       |
| <b>range)</b>      | 13.7;29.0                 | 2.1;10.9   | 18.7;48.8  | 30.7;68.0   | 15.0;36.6   | 6.9;34.5    | 0.47;3.80      | 1.7;32.8   |
| <b>BIA 2, n=38</b> |                           |            |            |             |             |             |                |            |
| <b>(median,</b>    | 20.3                      | 5.5        | 30.4       | 43.5        | 23.2        | 21.1        | 1.06           | 20.3       |
| <b>range)</b>      | 14.4;25.3                 | 1.8;8.0    | 21.7;41.7  | 31.9;58.6   | 18.7;35.0   | 6.4;34.1    | 0.68;5.13      | 2.1;51.5   |
| <b>BIA 3, n=29</b> |                           |            |            |             |             |             |                |            |
| <b>(median,</b>    | 20.3                      | 5.7        | 29.8       | 43.5        | 21.7        | 21.0        | 1.01           | 22.1       |
| <b>range)</b>      | 14.2;25.6                 | 1.7;9.6    | 20.8;41.6  | 30.0;58.9   | 17.8;33.7   | 5.8;35.0    | 0.53;5.81      | 1.8;33.1   |
| <b>BIA 4, n=14</b> |                           |            |            |             |             |             |                |            |
| <b>(median,</b>    | 20.8                      | 5.6        | 28.6       | 41.8        | 21.1        | 20.2        | 1.05           | 25.4       |
| <b>range)</b>      | 14.7;25.5                 | 2.7;7.4    | 21.3;41.3  | 31.1;57.8   | 18.4;29.2   | 8.9;31.3    | 0.75;2.49      | 3.1;31.0   |
| <b>BIA 5, n=8</b>  |                           |            |            |             |             |             |                |            |
| <b>(median,</b>    | 20.3                      | 5.2        | 28.4       | 41.4        | 22.5        | 18.9        | 1.13           | 20.4       |
| <b>range)</b>      | 14.3;23.7                 | 2.4;7.8    | 21.8;40.0  | 30.4;57.6   | 18.6;29.1   | 7.8;28.5    | 0.71;2.90      | 3.2;28.7   |

**Supplementary Table 1. Nutritional status as assessed by BMI and BIA parameters over time (T1 to**

**T5).** BMI: Body mass Index, BIA: bioelectrical impedance analysis, T1: time point 1, T5: time point 5,

PA: phase angle, TBW: total body water, FFM: fat-free mass, ECM: extracellular mass, BCM: body cell mass, FM: fat mass

|                        | VCmax (L)  | FEV1 (L)   | FEV1/ VCmax (%) | MEF50 (L/sec) | TLC (L)    |
|------------------------|------------|------------|-----------------|---------------|------------|
| <b>LF 1, n=58</b>      | 3.01       | 2.66       | 87.8            | 3.79          | 4.93       |
| <b>(median, range)</b> | 0.79; 5.58 | 0.57; 4.83 | 45.8; 99.8      | 0.37; 8.62    | 2.6; 8.87  |
| <b>LF 2, n=38</b>      | 3.08       | 2.51       | 86.52           | 3.69          | 5.00       |
| <b>(median, range)</b> | 1.07; 4.81 | 0.56; 4.45 | 45.46; 98.64    | 0.3; 7.46     | 2.80; 7.35 |
| <b>LF 3, n=29</b>      | 3.11       | 2.60       | 84.36           | 3.48          | 5.03       |
| <b>(median, range)</b> | 0.86; 4.78 | 0.54; 4.56 | 47.77; 99.54    | 0.31; 6.78    | 2.64; 6.96 |
| <b>LF 4, n=14</b>      | 3.12       | 2.63       | 80.47           | 3.60          | 5.07       |
| <b>(median, range)</b> | 1.06; 4.49 | 0.54; 4.48 | 46.69; 99.76    | 0.32; 6.79    | 2.74; 6.60 |
| <b>LF 5, n=8</b>       | 3.26       | 3.12       | 95.02           | 5.33          | 5.22       |
| <b>(median, range)</b> | 0.63; 4.58 | 0.43; 4.56 | 44.42; 99.59    | 0.31; 6.79    | 2.64; 6.55 |

**Supplementary Table 2. Absolute values of lung function parameters at T1 to T5 of the total patient population.** LF: lung function, T1: time point 1, T5: time point 5, VC: vital capacity; FEV1: forced expiratory volume in one second, FEV1%: forced expiratory volume in one second in percent; MEF50: maximal expiratory flow on 50% of FVC; TLC: total lung capacity

|                            | <b>VCmax<br/>%pred</b> | <b>FEV1 %pred</b> | <b>FEV1/<br/>%pred</b> | <b>VC</b>  | <b>MEF50 %pred</b> | <b>TLC %pred</b> |
|----------------------------|------------------------|-------------------|------------------------|------------|--------------------|------------------|
| <b>LF 1, n=58</b>          | 72.5                   | 73.8              | 102.5                  | 86.1       | 89.9               |                  |
| <b>(median,<br/>range)</b> | 23.0; 112.7            | 19.2; 111.5       | 56.7; 116.9            | 8.9; 268.0 | 53.0; 367.0        |                  |
| <b>LF 2, n=38</b>          | 72.3                   | 71.0              | 98.7                   | 80.6       | 88.6               |                  |
| <b>(median,<br/>range)</b> | 29.2; 101.4            | 18.9; 107.5       | 56.2; 117.1            | 7.3; 141.5 | 55.6; 119.8        |                  |
| <b>LF 3, n=29</b>          | 74.3                   | 71.6              | 98.6                   | 71.5       | 90.1               |                  |
| <b>(median,<br/>range)</b> | 25.9; 97.9             | 18.2; 110.7       | 59.2; 116.2            | 7.5; 135.6 | 54.7; 114.3        |                  |
| <b>LF 4, n=14</b>          | 77.9                   | 75.3              | 93.8                   | 80.0       | 97.9               |                  |
| <b>(median,<br/>range)</b> | 31.8; 95.9             | 18.2; 108.7       | 57.5; 116.2            | 7.8; 135.8 | 61.3; 112.3        |                  |
| <b>LF 5, n=8</b>           | 80.5                   | 80.4              | 107.7                  | 111.7      | 101.6              |                  |
| <b>(median,<br/>range)</b> | 18.9; 95.7             | 14.5; 110.7       | 55.1; 116.3            | 7.5; 135.8 | 59.1; 106.5        |                  |

**Supplementary Table 3. Lung function parameters at T1 to T5 expressed as %predicted values of the total patient population.** LF: lung function, T1: time point 1, T5: time point 5, VC: vital capacity; FEV1: forced expiratory volume in one second, FEV1%: forced expiratory volume in one second in percent; MEF50: maximal expiratory flow on 50% of FVC; TLC: total lung capacity
